# Supplementary material for: Oscillatoxin I: A New Aplysiatoxin Derivative, from a Marine Cyanobacterium
Source: MDPI journal article supplement (doi:10.3390/toxins11060366), 2019-06-21
Supplement: s1 [file s1]

## Oscillatoxin I, a New Aplysiatoxin Derivative, from a Marine Cyanobacterium

Hiroshi Nagai, Shingo Sato, Kaori Iida, Kazutaka Hayashi, Mioko Kawaguchi, Hajime Uchida and Masayuki Satake

Figure S1.  $^1\text{H}$  NMR spectrum of oscillatoxin I in acetone-  $d_6$ .

Figure S2. ESI-HRMS spectrum of oscillatoxin I in positive ion mode.

Figure S3.  $^1\text{H}$ – $^{13}\text{C}$  HSQC spectrum of oscillatoxin I in acetone-  $d_6$ .

Figure S4.  $^1\text{H}$ – $^{13}\text{C}$  HMBC spectrum of oscillatoxin I in acetone-  $d_6$ .

Figure S5.  $^1\text{H}$ – $^1\text{H}$  COSY NMR spectrum of oscillatoxin I in acetone-  $d_6$ .

Figure S6.  $^{13}\text{C}$  NMR spectrum of oscillatoxin I in acetone-  $d_6$ .

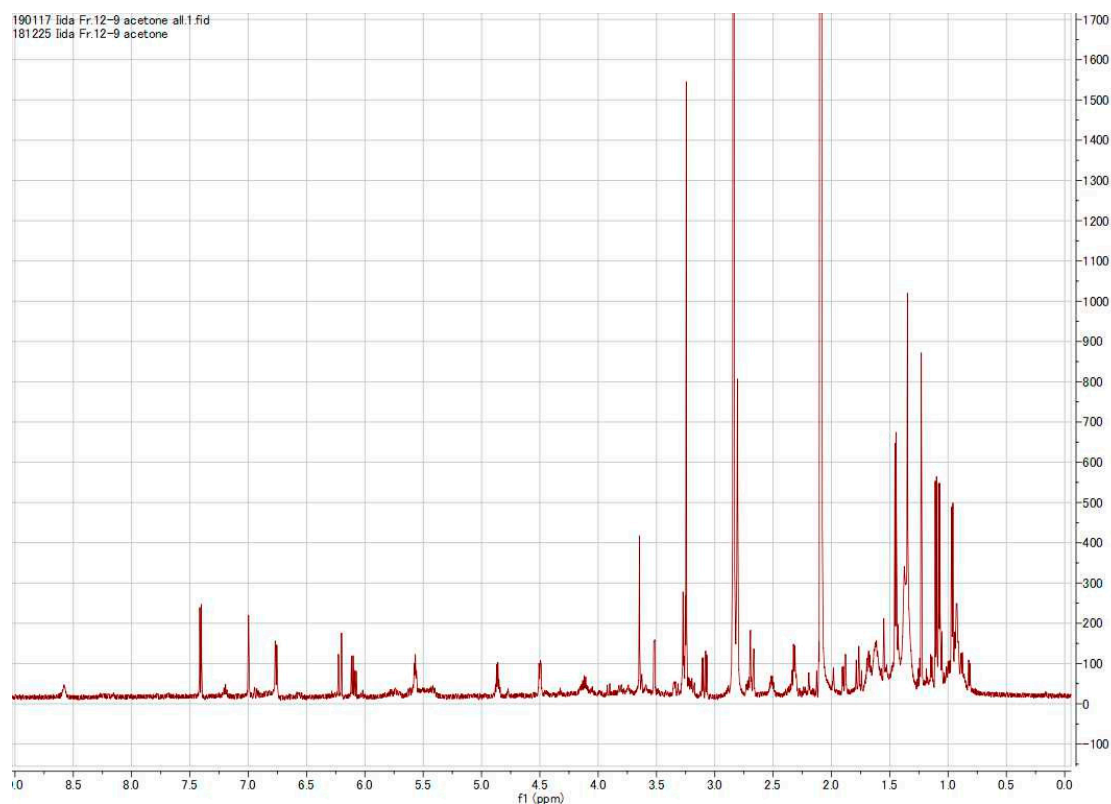

Figure S1.  $^1\text{H}$  NMR spectrum of oscillatoxin I (1) in acetone- $d_6$ .

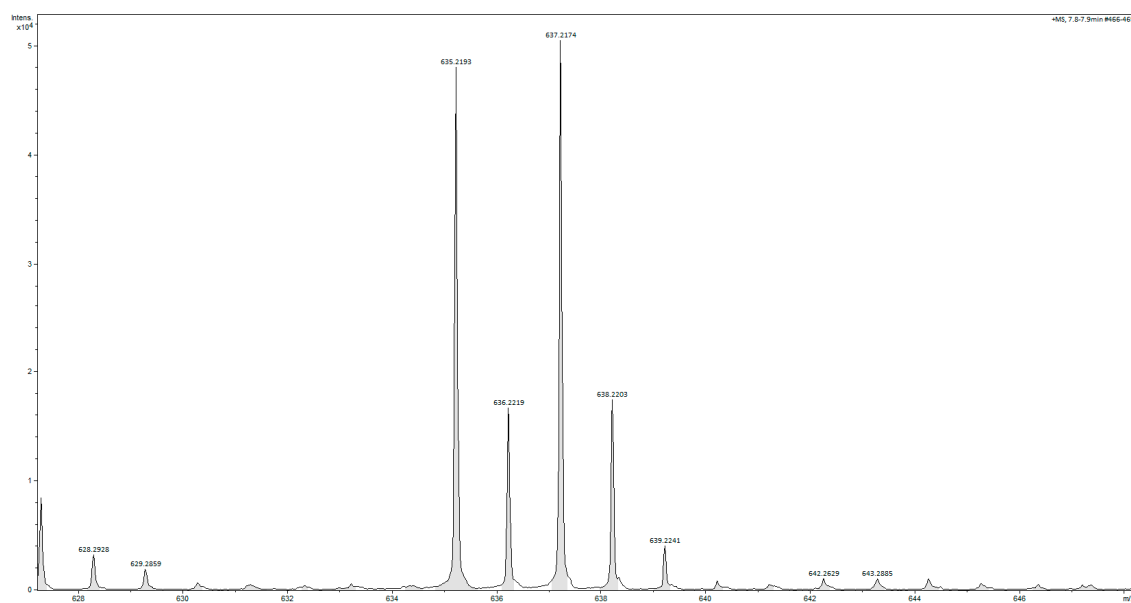

Figure S2. ESI-HRMS spectrum of oscillatoxin I (1) in positive ion mode.

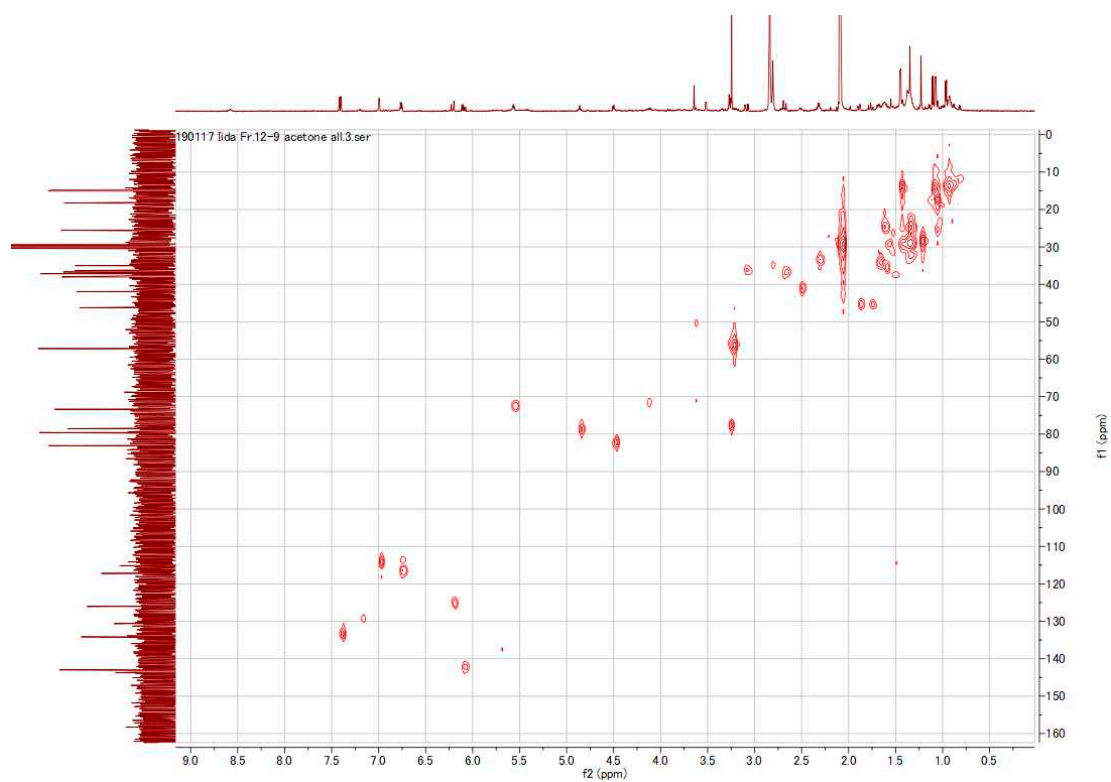

Figure S3.  $^1\text{H}$ - $^{13}\text{C}$  HSQC spectrum of oscillatoxin I (**1**) in acetone- $d_6$ .

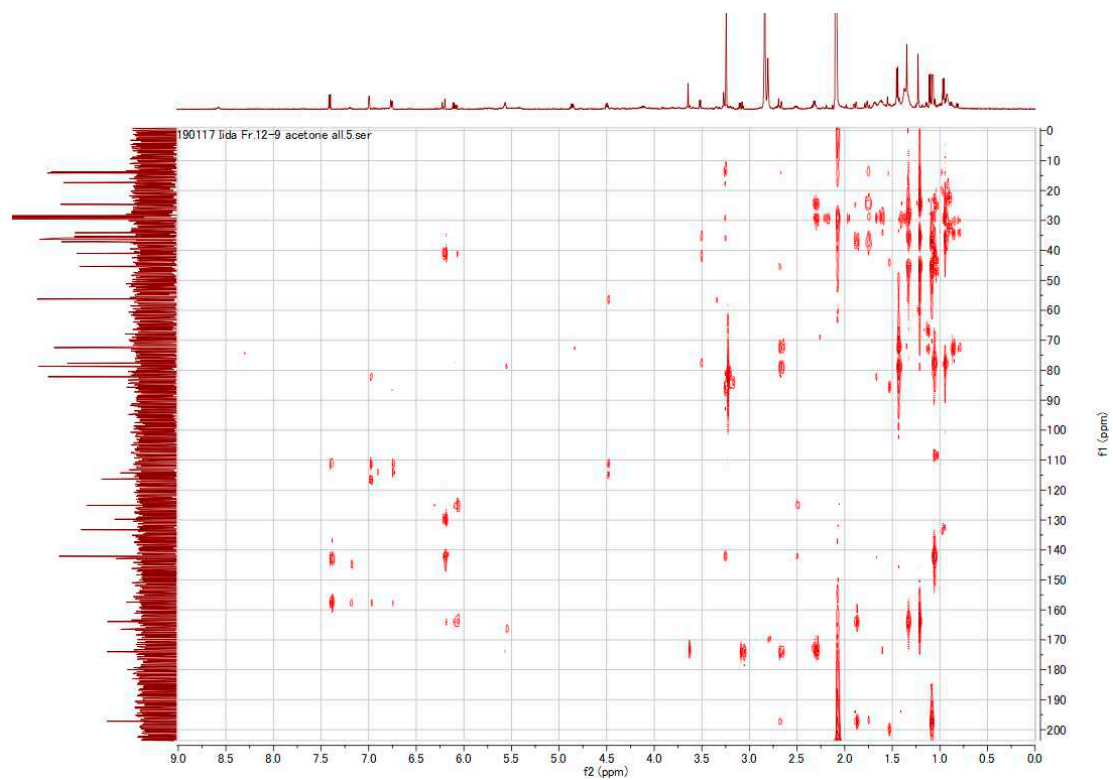

Figure S4.  $^1\text{H}$ - $^{13}\text{C}$  HMBC spectrum of oscillatoxin I (**1**) in acetone- $d_6$ .

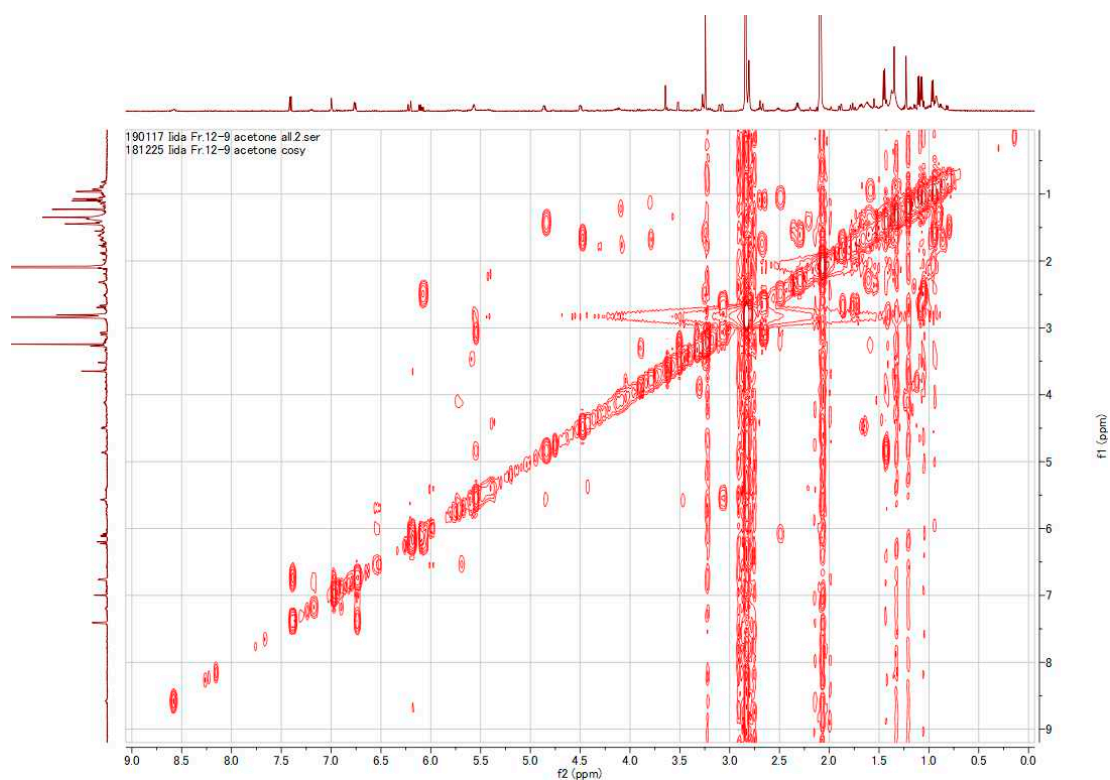

**Figure S5.**  $^1\text{H}$ - $^1\text{H}$  COSY NMR spectrum of oscillatoxin I (**1**) in acetone- $d_6$ .

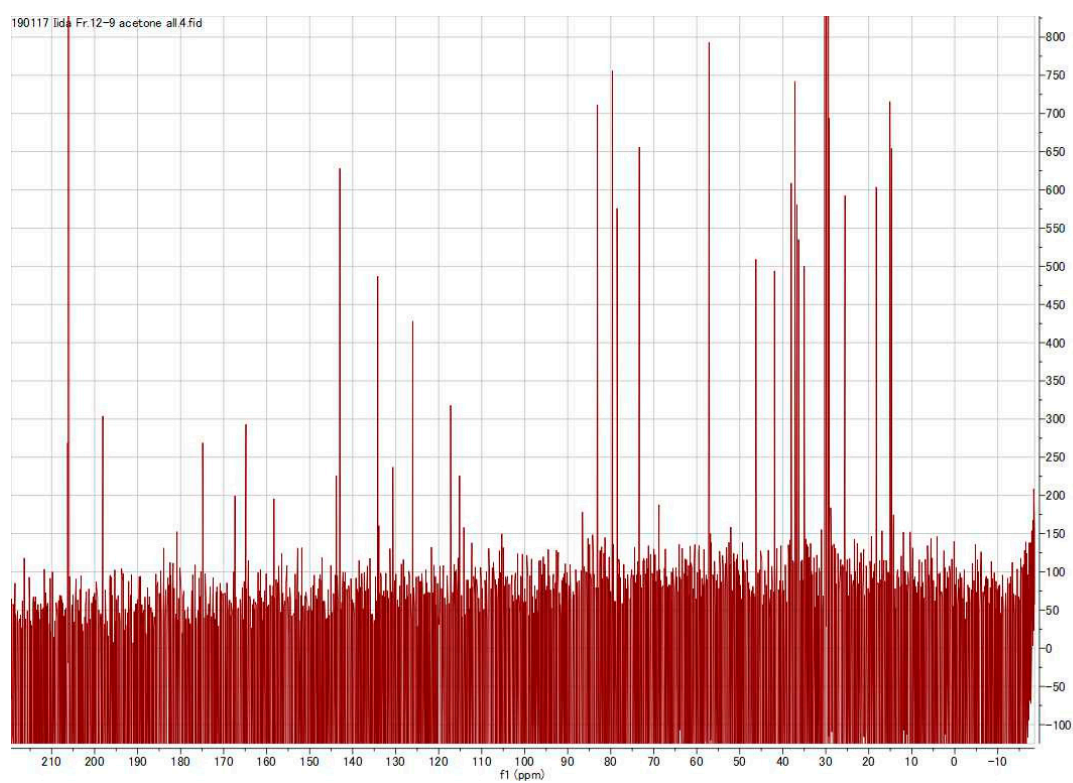

**Figure S6.**  $^{13}\text{C}$  NMR spectrum of oscillatoxin I (**1**) in acetone- $d_6$ .
